# Supplementary material for: Calix[4]amido crown functionalized visible sensors for cyanide and iodide anions
Source: Royal Society of Chemistry journal article supplement (doi:10.1039/d1ra03608d), 2021-01-01
Supplement: d1ra03608d1.pdf [file d1ra03608d1.pdf]

## Electronic Supporting Information

### Calix[4]amido Crown Functionalized Visible Sensors for Cyanide and Iodide Anions

Pragati R Sharma,<sup>\*a</sup> Shubham Pandey,<sup>a</sup> Apoorva Malik,<sup>a</sup> Ganpat Choudhary,<sup>a</sup> Vineet K Soni<sup>a</sup> and Rakesh K Sharma<sup>\*a</sup>

Sustainable Materials and Catalysis Research Laboratory (SMCRL),  
Department of Chemistry, Indian Institute of Technology Jodhpur  
NH 65, Karwar, Jodhpur-342037, India

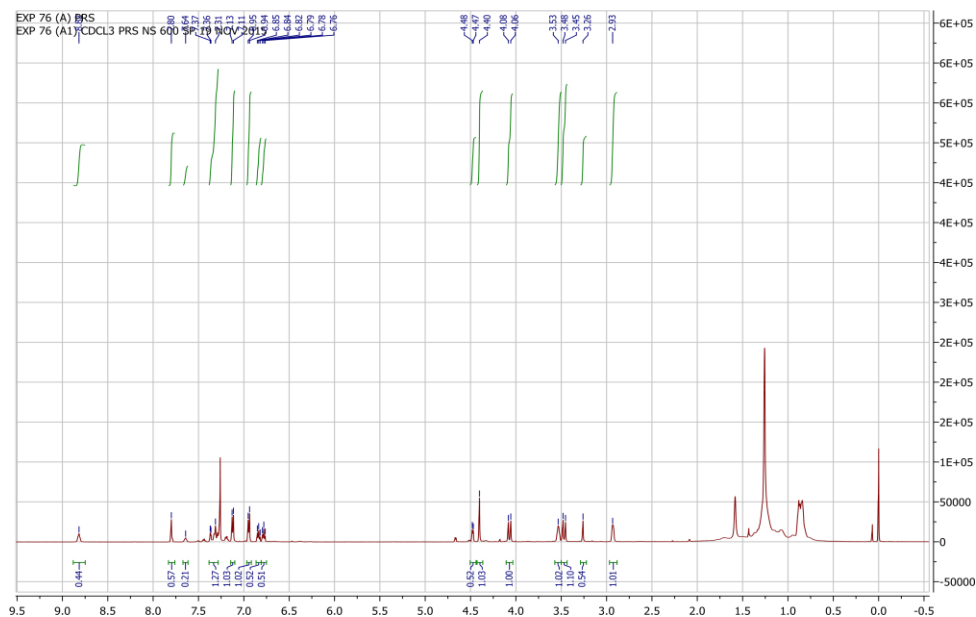

Figure S1. <sup>1</sup>H NMR spectrum of Ionophore I (500 MHz, CDCl<sub>3</sub> at 25 °C).

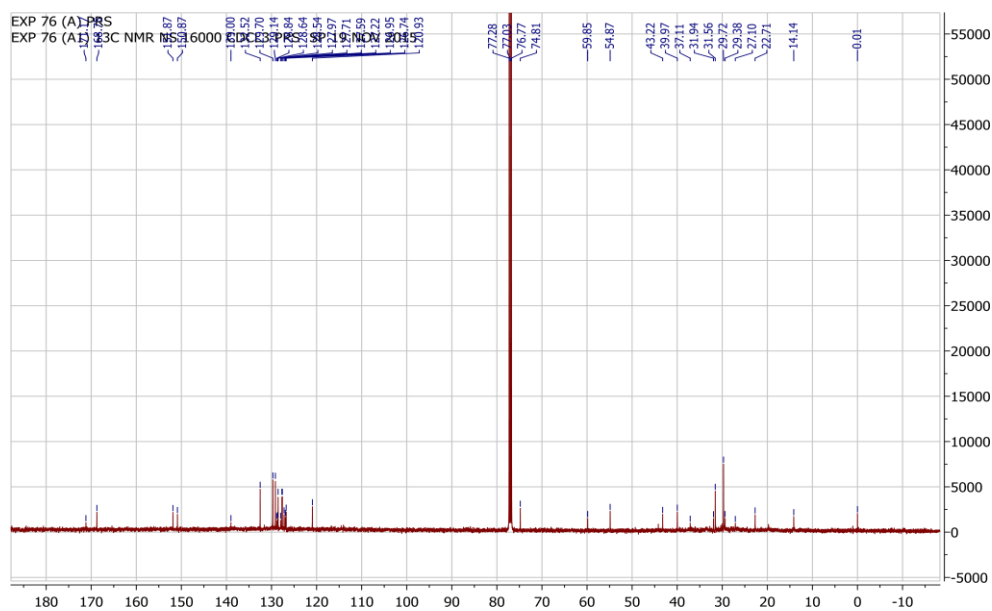

Figure S2. <sup>13</sup>C NMR spectrum of Ionophore I (500 MHz, CDCl<sub>3</sub> at 25 °C).

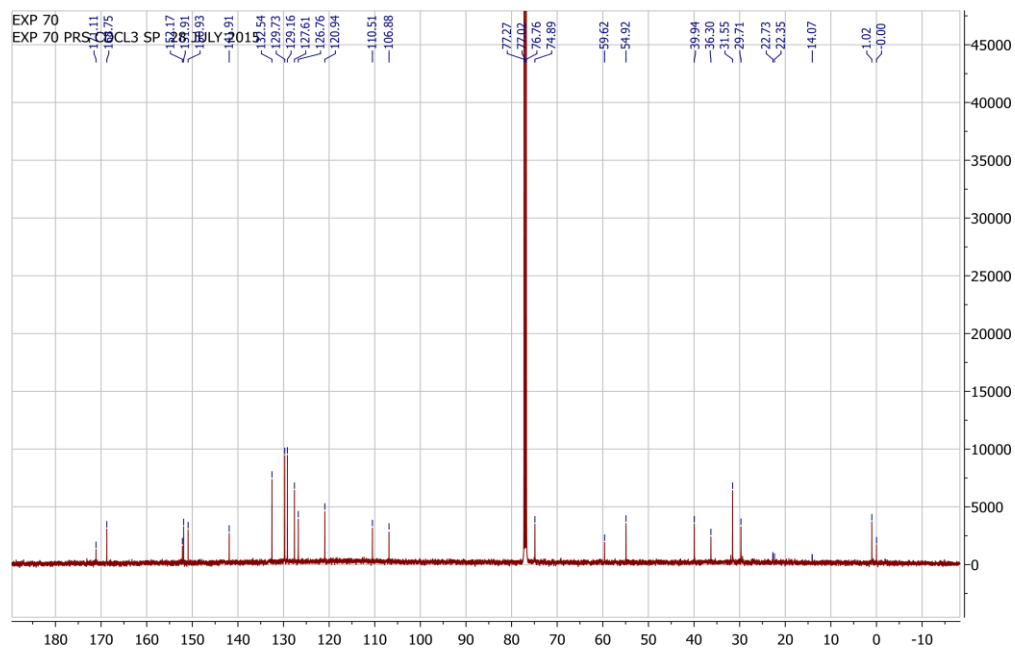

Figure S3.  $^1\text{H}$ NMR spectrum of Ionophore II (500 MHz,  $\text{CDCl}_3$  at  $25^\circ\text{C}$ ).

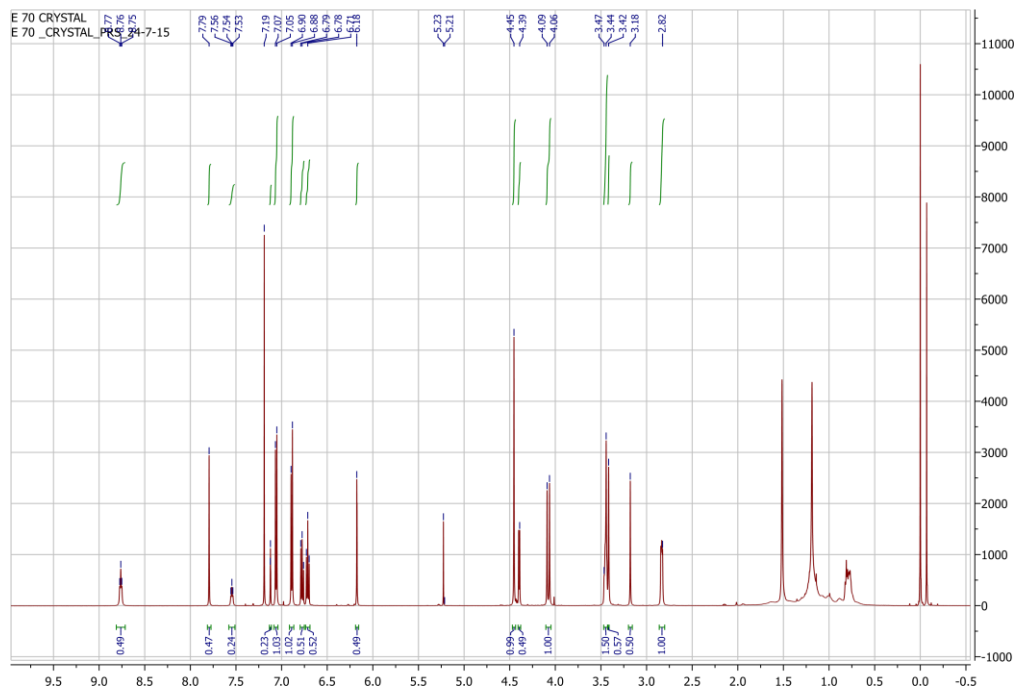

Figure S4.  $^{13}\text{C}$ NMR spectrum of Ionophore II (500 MHz,  $\text{CDCl}_3$  at  $25^\circ\text{C}$ ).

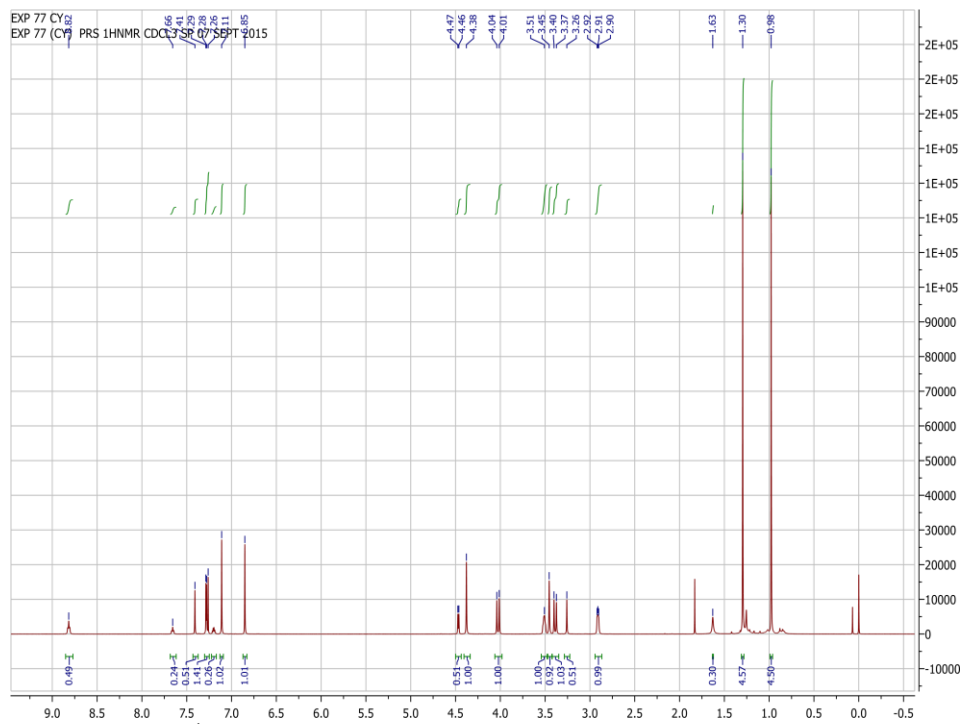

Figure S5. <sup>1</sup>H NMR spectrum of Ionophore III (500 MHz, CDCl<sub>3</sub> at 25 °C).

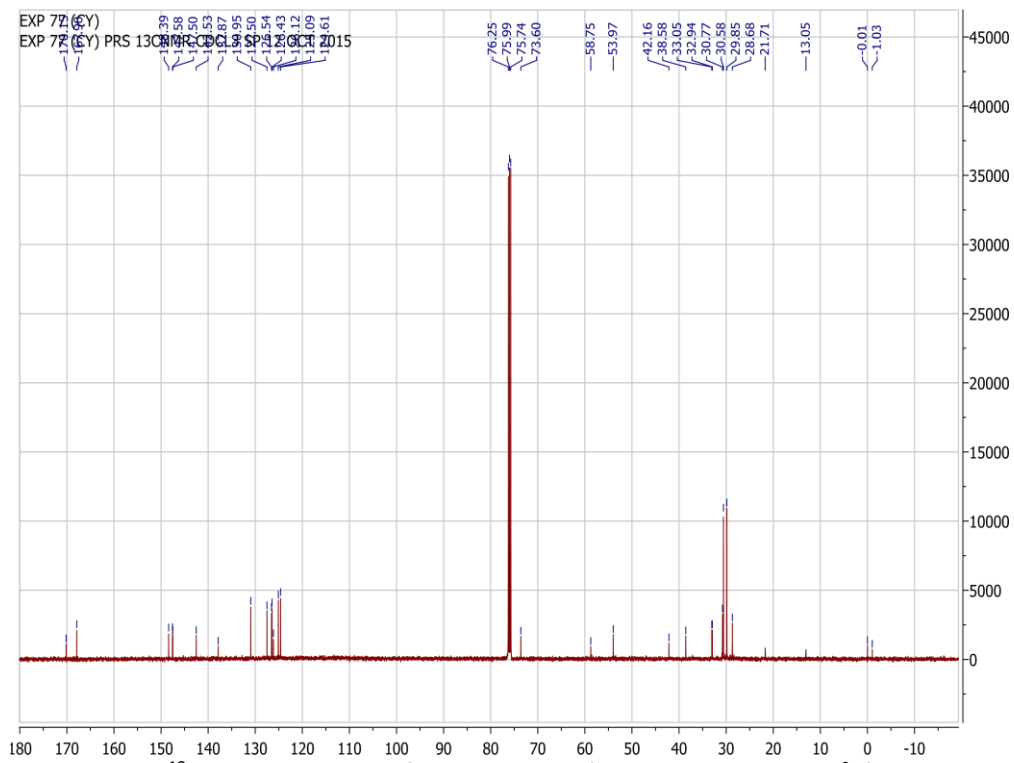

Figure S6. <sup>13</sup>C NMR spectrum of Ionophore III (500 MHz, CDCl<sub>3</sub> at 25 °C).

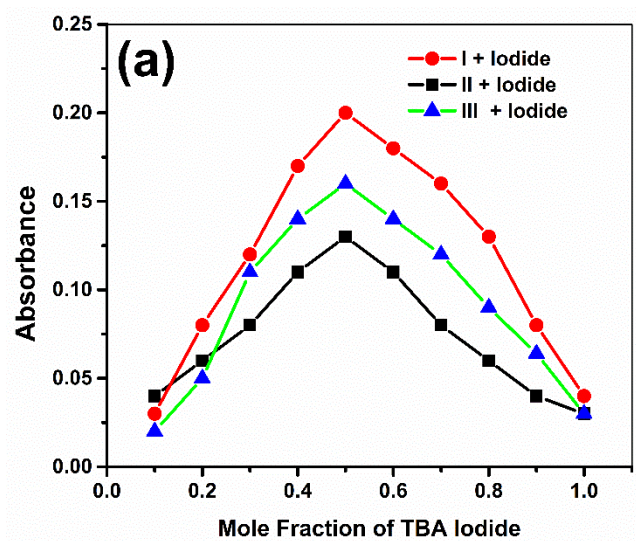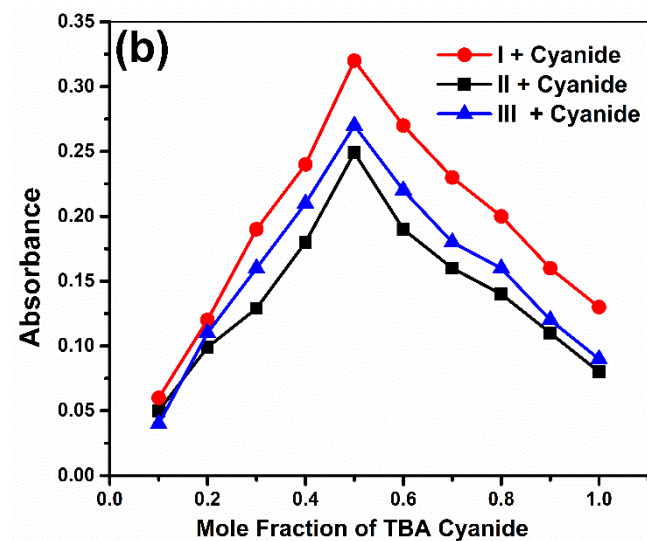

Figure S7. Showings Job's Plot for anions capture by ionophore's (a) TBA salt of iodide and (b) TBA salt of cyanide.

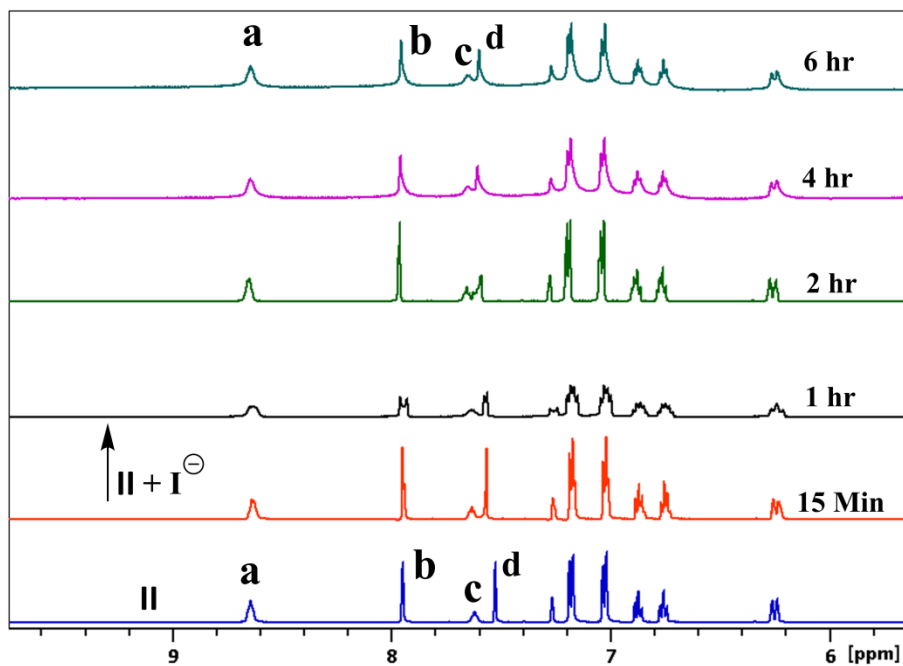

**Figure S 8.** A part of time-dependent  $^1\text{H}$  NMR spectra (500 MHz) in  $\text{CDCl}_3:\text{CD}_3\text{CN}$  at  $25^\circ\text{C}$  showing protons of lonophore II in the absence and the presence of iodide anion.

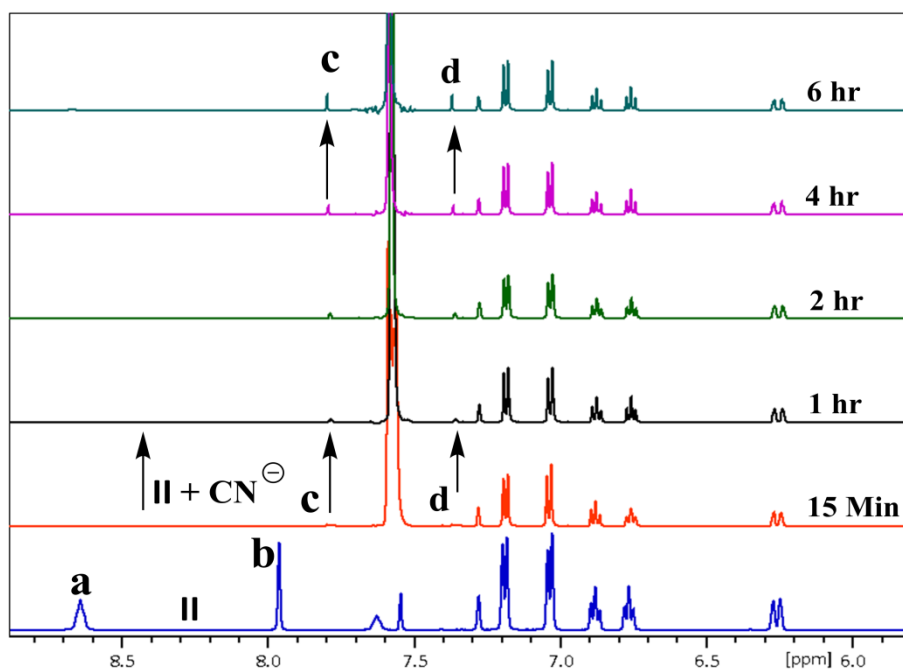

**Figure S 9.** A part of time-dependent  $^1\text{H}$  NMR spectra (500 MHz) in  $\text{CDCl}_3:\text{CD}_3\text{CN}$  at  $25^\circ\text{C}$  showing protons of lonophore II in the absence and the presence of cyanide anion.

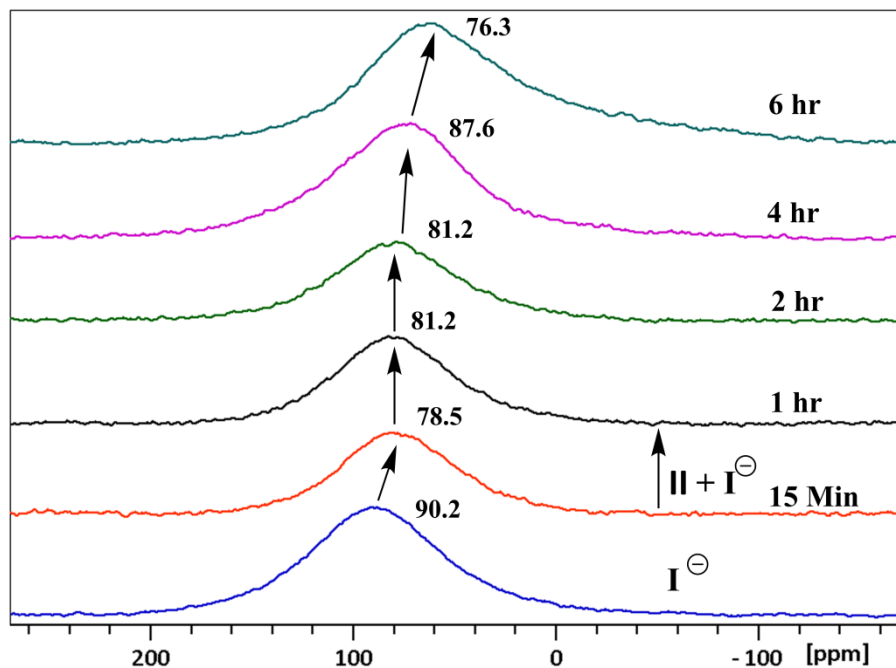

**Figure S10.** Time-dependent  $^{127}\text{I}$  NMR spectra (500 MHz) in  $\text{CDCl}_3$ :  $\text{CD}_3\text{CN}$  at  $25^\circ\text{C}$  showing  $^{127}\text{I}$  peaks of Tetrabutylammonium iodide the absence, as well as in the presence, of Ionophore II.

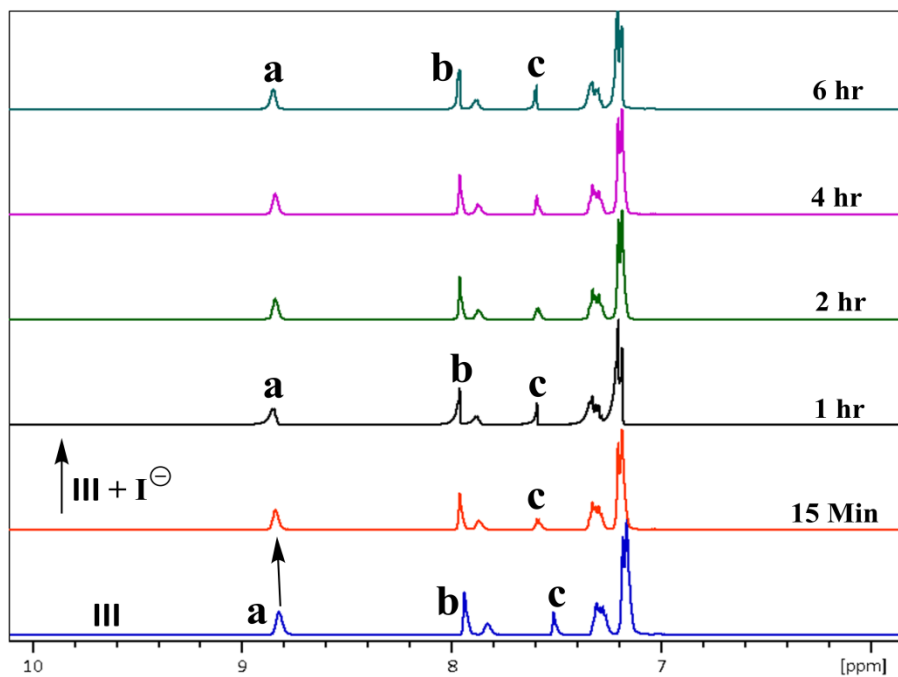

**Figure S11.** A part of time-dependent  $^1\text{H}$  NMR spectra (500 MHz) in  $\text{CDCl}_3$ :  $\text{CD}_3\text{CN}$  at  $25^\circ\text{C}$  showing protons of Ionophore III in the absence, as well as in the presence, of Iodide anion.

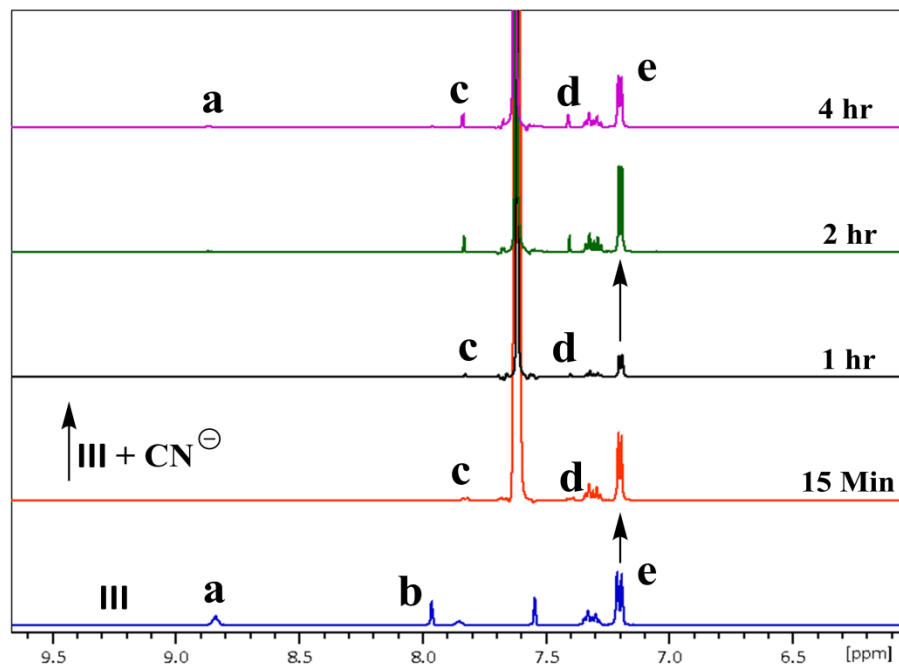

**Figure S12.** A part of time dependent  $^1\text{H}$  NMR spectra (500 MHz) in  $\text{CDCl}_3$ :  $\text{CD}_3\text{CN}$  at  $25^\circ\text{C}$  showing protons of lonophore III in the absence, as well as in the presence, of cyanide anion.

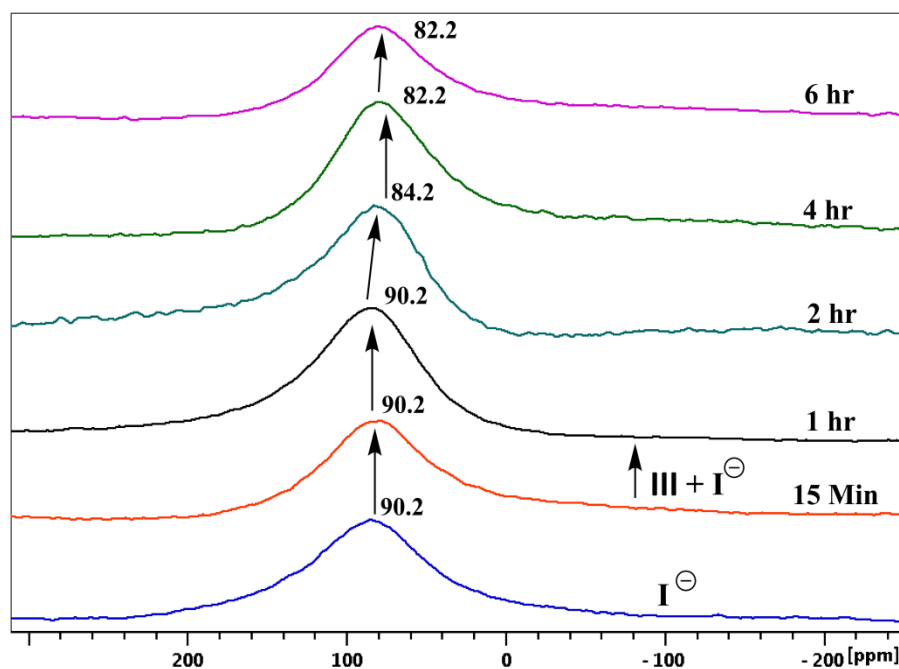

**Figure S13.** Time-dependent  $^{127}\text{I}$  NMR spectra (500 MHz) in  $\text{CDCl}_3$ :  $\text{CD}_3\text{CN}$  at  $25^\circ\text{C}$  showing  $^{127}\text{I}$  peaks of Tetrabutylammonium iodide absence, as well as in the presence, of lonophore III.

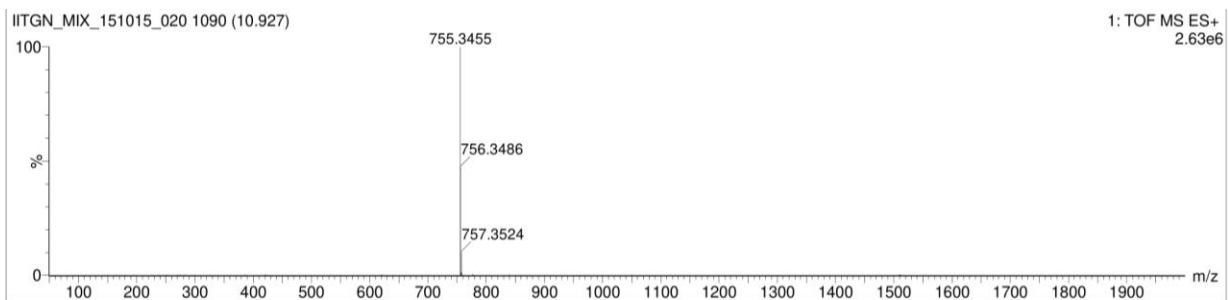

**Figure S14.** Mass Spectra of ionophore I.

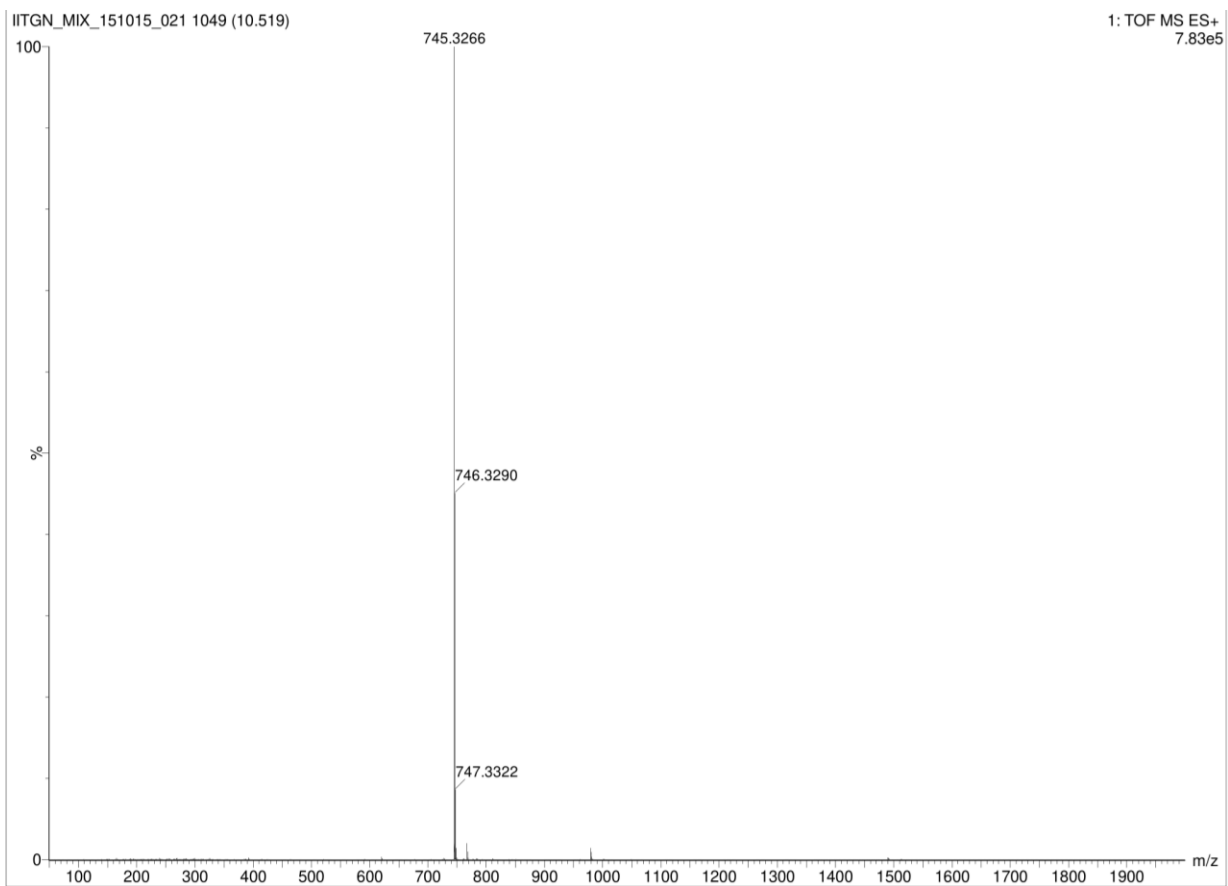

**Figure S15.** Mass Spectra of ionophore II.



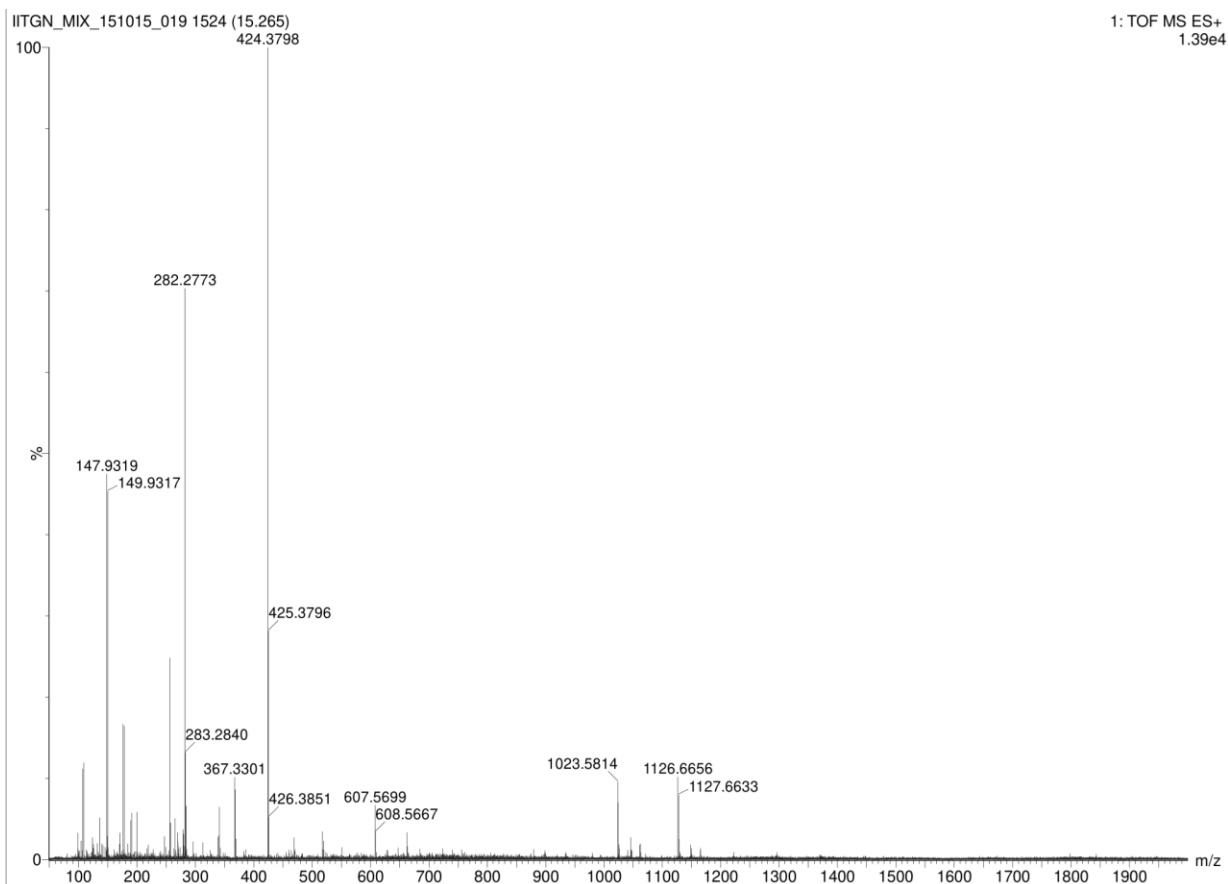

**Figure S16.** Mass Spectra of ionophore III

**Table S1.** X-ray crystal structure data of Ionophore I

| Ionophore            | I                                                                                            |
|----------------------|----------------------------------------------------------------------------------------------|
| Empirical Formula    | $C_{46}H_{47}Cl_3N_4O_{10}$                                                                  |
| Formula mass         | 922.23                                                                                       |
| Crystal color        | Colorless                                                                                    |
| Crystal size         | 0.21x0.12x0.11                                                                               |
| Temperature (K)      | 298 (2)                                                                                      |
| Crystal system       | Monoclinic                                                                                   |
| Space group          | P 21/c                                                                                       |
| Unit cell dimensions | $a = 14.3406(8) \text{ \AA}$ , $b = 17.5842(11) \text{ \AA}$ , $c = 19.2583(11) \text{ \AA}$ |
| Cell Angles          | $\alpha = 90.00^\circ$ , $\beta = 105.478(3)^\circ$ , $\gamma = 90.00^\circ$                 |

|                                                  |                          |
|--------------------------------------------------|--------------------------|
| Cell Volume                                      | 4680.2(5) Å <sup>3</sup> |
| Z                                                | 4                        |
| Calculated Density                               | 1.309 g/cm <sup>3</sup>  |
| Abs. Coeff. (mm <sup>-1</sup> )                  | 0.256                    |
| F(000)                                           | 1928                     |
| Reflection no. total                             | 8217                     |
| Reflection got                                   | 5666                     |
| No. of parameter                                 | 570                      |
| S (GOF)on F2                                     | 1.925                    |
| Final R1 WR2( >21)weighted R1,<br>WR2 (all data) | 0.3244 , 0.2791          |
| R <sub>all</sub>                                 | 0.1390                   |
| CCDC Number                                      | 1506051                  |

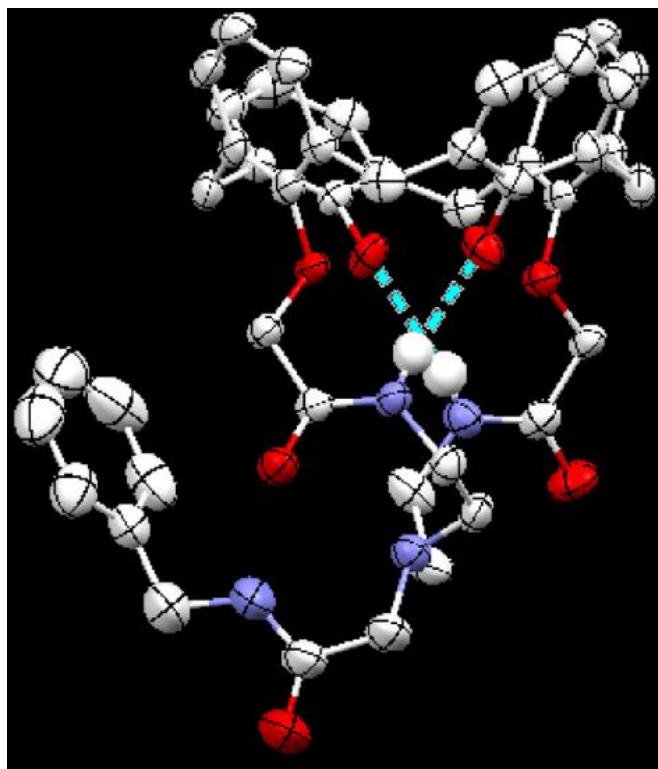

Figure S17. Single Crystal X-ray Structure of ionophore I (50% probability)

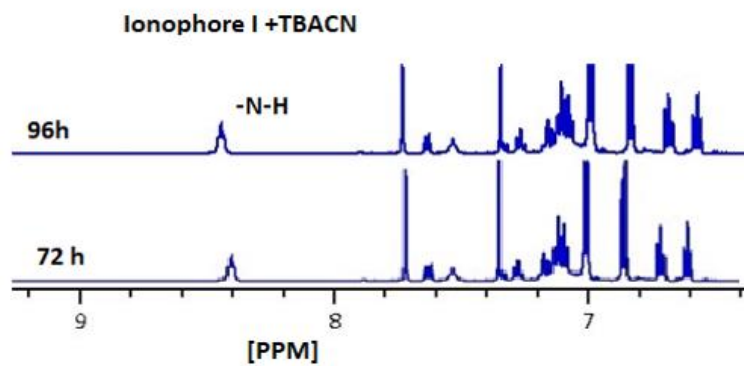

Figure S18: Time dependent NMR when color is reappearing after 72 hrs.
